# Supplementary material for: Structure of the HCMV UL16-MICB Complex Elucidates Select Binding of a Viral Immunoevasin to Diverse NKG2D Ligands
Source: PLoS Pathog. 2010 Jan 15;6(1):e1000723. doi: 10.1371/journal.ppat.1000723 (PMC2797645; doi:10.1371/journal.ppat.1000723)
Supplement: Table S1 — Kinetic and affinity data determined by SPR (0.04 MB DOC) [file ppat.1000723.s001.doc]

**Supplemental Table S1**

**Table S1: Kinetic and affinity data determined by SPR**

| Experimental setup | | Steady-State-Analysis | Kinetic Analysis | | | Average Affinity |
| --- | --- | --- | --- | --- | --- | --- |
| Immobilized  (ligand) | in solution  (analyte) | KD [M] | KD [M] | kon [M-1s-1] | koff [s-1] | KD [M] |
| MICBpf (α1-2) | UL16 | 66∙10-9 | 66∙10-9 | 0.82∙106 | 0.054 | 66∙10-9 |
| MICB (α1-3) | 68∙10-9 | 66∙10-9 | 0.68∙106 | 0.045 | 67∙10-9 |
| ULBP1-Fc | n.d.* | 12∙10-9 | 1.31∙106 | 0.016 | 12∙10-9 |
| ULBP2-Fc | 43∙10-9 | 42∙10-9 | 1.71∙106 | 0.072 | 43∙10-9 |
| ULBP3-Fc | No SPR response was observed upon injection of 100 µM UL16a) | | | | |
| ULBP4-Fc |
| ULBP5-Fc |

a) Samples with low analyte concentrations did not reach chemical equilibrium (plateau phase) during injection, which is required to perform a reliable steady-state analysis.
